# Supplementary material for: Deletion of Snai2 and Snai3 Results in Impaired Physical Development Compounded by Lymphocyte Deficiency
Source: PubMed Central journal article supplement (PMC3713067; doi:10.1371/journal.pone.0069216), 2013-07-16
Supplement: pone.0069216.s001.pdf [file pone.0069216.s001.pdf]

Pioli, et al. Deletion of *Snai2* and *Snai3* Results in Impaired Physical Development Compounded by Lymphocyte Deficiency

Supporting Information File S1

Figures S1-S9

Table S1

Figure S1



**Figure S1. *Snai3* transcripts are widely expressed among mouse tissues.** Total RNA was isolated from whole mouse tissues and cDNA was generated. PCR amplification was performed in the presence of [<sup>32</sup>P] dCTP and products were subjected to electrophoresis in a polyacrylamide sequencing gel [47]. *Snai3* (28 cycles) and *Actb* (16 cycles) were amplified using a constant cycle number for all samples. Products were detected by exposure to X-ray film at -80°C. A representative gel image is presented from the tissues obtained from a single mouse. Primer sequences are listed in Supplemental Table 1.

Figure S2



**Figure S2. RT-PCR analysis of *Snai3* transcripts in *Snai3* conditional knockout mice.** (A) RT-PCR analysis of *Snai3* expression in total thymus RNA prepared from *Lck-Cre*-possessing animals with WT *Snai3* genes (WT Cre<sup>+</sup>), WT and targeted *Snai3* alleles (Het Cre<sup>+</sup>) and both targeted *Snai3* alleles (KO Cre<sup>+</sup>). (B) RT-PCR analysis of *Snai3* expression by cells from WT and *Snai3* targeted, Cre<sup>+</sup> animals (KO). Total, total splenocytes; CD3<sup>+</sup> and B220<sup>+</sup> purified subsets of T and B cells, respectively. (C) RT-PCR analysis of *Snai3* expression by CD4<sup>+</sup> and CD8<sup>+</sup> selected splenic T cells from WT and KO (both *Snai3* targeted alleles with *Lck-Cre*). Values in panels A,B,C are *Snai3* transcripts per 1000 *Actb* transcripts and are averages from n=3 mice ± standard deviation. \* denotes statistically significant reduction in transcript level versus all other conditions p-value < 0.05.

Figure S3



**Figure S3. FACS analysis of conditional *Snai3* knockout mice.** (A) FACS quantification of CD4<sup>+</sup> (black bar) and CD8<sup>+</sup> single positive cells in the thymus of WT (C57BL/6) and those with both *Snai3* targeted alleles with *Lck-Cre* (KO Cre). (B) The same single positive analysis of WT and KO T cells from the spleen. There is no significant difference in cell numbers between these two strains of mouse. Percentages are averages from n=3 mice ± standard deviation.

Figure S4

A



**Figure S4. RT-PCR analysis of *Snai3* transcription in germline knockout mice.** RNA was extracted from total thymus or total spleen tissue and analyzed for *Snai3* expression. Wild type (WT)(C57BL/6) and Full KO (germline deletion of *Snai3*) animals were used for tissue harvest. Both thymus (p-value  $\leq 0.008$ ) and spleen (p-value  $\leq 0.01$ ) had significant decreases in the *Snai3* transcript level in the KO animals compared to WT mice. Values are *Snai3* transcript per 1000 *Actb* transcripts and are averages from n=3 mice  $\pm$  standard deviation. \* denotes statistically significant reduction in transcript level with a p-values  $\leq 0.01$ .

Figure S5



**Figure S5. *Snai3* immunoblot from WT and *Snai3KO* bone marrow.** Whole cell lysates were generated from WT and *Snai3KO* bone marrow. Blots were probed with a *Snai3*-specific antibody at a dilution of 1:250. *Snai1* and *Snai2* were not detected. Cross-reactivity to the immunoglobulin heavy chain (IgH) served as an internal loading control. Short and long exposures are shown. Bone marrow from single WT and *Snai3KO* animals were examined.

Figure S6



**Figure S6. *Snai1*, *Snai2* and *Snai3* gene expression and protein products in the DKO mice.** Testes were harvested from WT and *Snai2/Snai3* DKO animals, and RNA and protein were harvested. (A) Quantitative RT-PCR of RNA obtained from testes for *Snai2* and *Snai3* expression. Data shown are relative transcripts per 1,000 *Actb* transcripts and are averages from n=3 mice,  $\pm$  standard error (SEM). (B) Immunoblot of *Snai2* and *Snai3* protein expression in the total testes protein samples with  $\beta$ -actin as loading control. Dilution of antibodies used for the blots is noted. Testes were examined from single WT and DKO animals. (C) Quantitative RT-PCR of RNA obtained from testes for *Snai1* expression. Data shown are relative transcripts per 1,000 *Actb* transcripts and are averages from n=3 mice  $\pm$  standard error (SEM). (D) Immunoblot of *Snai1* protein expression in the total testes protein samples with  $\beta$ -actin as loading control. Dilution of the antibodies used for the blots is noted. Testes were examined from single WT and DKO animals.

**Figure S7**

**A**



**B**



**C**



**Figure S7. Representative WT and DKO T cell FACS plots.** Cells were analyzed for CD4 (y-axis) and CD8 (x-axis) surface expression. In the thymus, double positive cells are represented by CD4<sup>+</sup>CD8<sup>+</sup>. Representative plots are shown for the thymus (A), peripheral blood (B), and spleen (C), and are from single WT or DKO animals.

**Figure S8**

**A**



**B**



**C**



**Figure S8. Representative WT and DKO B cell FACS plots.** Cells were analyzed for CD19 (y-axis) and B220 (x-axis) surface expression. In bone marrow, B220<sup>+</sup>CD19<sup>-</sup> staining represents pre-pro-B cells. B220<sup>+</sup>CD19<sup>+</sup> staining represents pro-, pre-, immature, and mature re-circulating B cells. In peripheral blood and spleen, B cells are collectively defined as B220<sup>+</sup>CD19<sup>+</sup>. Representative plots are shown for the bone marrow (A), peripheral blood (B), and spleen (C), and are from single WT or DKO animals.

**Figure S9**

**A**



**B**



**C**



**Figure S9. Representative WT and DKO myeloid cell FACS plots.** Cells were analyzed for CD11b (y-axis) and Gr1 (x-axis) surface expression. CD11b<sup>+</sup>Gr1<sup>int</sup> staining represents macrophages. CD11b<sup>+</sup>Gr1<sup>hi</sup> staining represents neutrophils, a subset of granulocytes. Representative plots are shown for the bone marrow (A), peripheral blood (B), and spleen (C), and are from single WT or DKO animals.

**Table S1:** Oligonucleotides used in genotyping and RT-PCR

| <b>Genomic Oligos</b>         | <b>Forward (5' -&gt; 3')</b> | <b>Reverse (5' -&gt; 3')</b> |
|-------------------------------|------------------------------|------------------------------|
| P1 (3093)                     | ATCTATGCCTGGAAGGGGAGAGG      | N/A                          |
| P2 (3099)                     | N/A                          | GCGTTCACATTCACGGTTGC         |
| P3 (3080)                     | CCTTGCCAGCACTTGTCTCTTC       | N/A                          |
| P4 (3079)                     | N/A                          | GAAATCTGCCAGCCTCTGCCTATCC    |
| <i>Snai2</i> WT (4861/4712)   | CATCCTTGGGGCGTGTAAAGTCC      | CACATATTCCTTGTCCAGTACTTGC    |
| <i>Snai2</i> KO (4709/4707)   | CTCTTGGCTGTGATTGGTTACTTC     | TGGCGCCTACCGGTGGATGTGGAATG   |
| <b>RT-PCR Oligos</b>          | <b>Forward (5' -&gt; 3')</b> | <b>Reverse (5' -&gt; 3')</b> |
| <i>Snai1</i> (4990/4991)      | CCGGAAGCCCAACTATAGCG         | CGCACTTGGGGTACCAGGAG         |
| <i>Snai2</i> (4992/4993)      | CCTCCAAGAAGCCCAACTAC         | GGGTAAAGGAGAGTGGAGTG         |
| <i>Snai3</i> (QT) (2421/2422) | TGCCGCGCTCCTTCCTGGTG         | CAGAGGTACTGTCCCAAGGC         |
| <i>Actb</i> (62/339)          | GTAACAATGCCATGTTCAAT         | CTCCATCGTGGGCCGCTCTAG        |

**Table S1. Genotyping and RT-PCR Oligos.** Primers used for genotyping and RT-PCR analysis. Genomic oligos were used for genotyping. RT-PCR oligos were used for mRNA transcript analysis.
